# Supplementary material for: Therapy-related myeloid neoplasms in Korean patients with ovarian or primary peritoneal cancer treated with poly(ADP-ribose) polymerase inhibitors
Source: PubMed Central journal article supplement — Transl Cancer Res. 2024 Nov 12;13(11):6018–27. doi: 10.21037/tcr-24-1131 (PMC11651792; doi:10.21037/tcr-24-1131), 2024-11-12
Supplement: tcr-13-11-6018-dss.pdf [file tcr-13-11-6018-dss.pdf]

## Data Sharing Statement

|                     |                                                                                                                                                     |                                                                                                                                                         |
|---------------------|-----------------------------------------------------------------------------------------------------------------------------------------------------|---------------------------------------------------------------------------------------------------------------------------------------------------------|
| <b>Article Info</b> | <a href="https://dx.doi.org/10.21037/tcr-24-1131">https://dx.doi.org/10.21037/tcr-24-1131</a>                                                       |                                                                                                                                                         |
| <b>Item</b>         | <b>Question</b>                                                                                                                                     | <b>Authors' Response<br/>(place "-" if not applicable)</b>                                                                                              |
| 1                   | Would you like to share data collected for your study to others?                                                                                    | Yes.                                                                                                                                                    |
| 2                   | If not, would you like to share the reason for your decision?                                                                                       | -                                                                                                                                                       |
| 3                   | What data in particular will be shared?                                                                                                             | We plan to share the incidence and characteristics of t-MNs that occurred after the use of PARPi. This data has not been previously presented in Korea. |
| 4                   | Any other documents will be shared? Such as study protocol, statistical analysis plan, informed consent form, clinical study report, analytic code. | The study protocol and statistical analysis plan will also be shared if requested.                                                                      |
| 5                   | When will data availability begin?                                                                                                                  | From the publication date.                                                                                                                              |
| 6                   | When will data availability end?                                                                                                                    | Three years within the publication date, since the technique or survival data may be updated over time.                                                 |
| 7                   | To whom will you share the data?                                                                                                                    | Medical hematologists, oncologists, and gynecologic surgeons who are interested in studies of PARPi.                                                    |
| 8                   | For what type of analysis or purpose?                                                                                                               | Analysis of the characteristics of t-MNs occurring after the use of PARPi in ovarian cancer patients.                                                   |
| 9                   | How or where can the data/documents be obtained?                                                                                                    | Emails could be sent to the address below to obtain the shared data:<br>hyejin@kirams.re.kr                                                             |
| 10                  | Any other restrictions?                                                                                                                             | We may balance the potential benefits and risks for each request and then provide the data that could be shared.                                        |
