# Supplementary material for: Therapy-related myeloid neoplasms in Korean patients with ovarian or primary peritoneal cancer treated with poly(ADP-ribose) polymerase inhibitors
Source: PubMed Central journal article supplement — Transl Cancer Res. 2024 Nov 12;13(11):6018–27. doi: 10.21037/tcr-24-1131 (PMC11651792; doi:10.21037/tcr-24-1131), 2024-11-12
Supplement: tcr-13-11-6018-supplementary.pdf [file tcr-13-11-6018-supplementary.pdf]

**Table S1** Characteristics of studies on t-MNs occurring after PARPi therapy

| Previous study                       | Types of PARPi                              | Cancer type    | All patient numbers | Number of patients diagnosed with t-MNs (%) | Previous chemotherapy |
|--------------------------------------|---------------------------------------------|----------------|---------------------|---------------------------------------------|-----------------------|
| Matulonis <i>et al.</i> [2023] (15)  | Niraparib                                   | Ovarian cancer | 367                 | 14 (3.81)                                   | Two                   |
| Marmouset <i>et al.</i> [2022] (14)  | Olaparib, niraparib, rucaparib, talazoparib | Ovarian cancer | 373                 | 13 (3.49)                                   | Two                   |
| DiSilvestro <i>et al.</i> [2023] (6) | Olaparib                                    | Ovarian cancer | 260                 | 4 (1.54)                                    | One                   |
| Poveda <i>et al.</i> [2021] (22)     | Olaparib                                    | Ovarian cancer | 195                 | 6 (3.08)                                    | At least two          |
| O'Malley <i>et al.</i> [2022] (5)    | Rucaparib                                   | Ovarian cancer | 375                 | 14 (3.73)                                   | At least two          |

t-MNs, therapy-related myeloid neoplasms; PARPi, poly(ADP-ribose) polymerase inhibitor.
